# Supplementary material for: In Situ Visualization of the pKM101-Encoded Type IV Secretion System Reveals a Highly Symmetric ATPase Energy Center
Source: PubMed Central journal article supplement (PMC8510550; doi:10.1128/mbio.02465-21), 2021-10-12
Supplement: mbio.02465-21-s0001.pdf [file mbio.02465-21-s0001.pdf]

**Movie S1.** 3-D visualization of a tomographic reconstruction and the T4SS<sub>pKM101</sub> in *E. coli* minicells.

**Movie S2.** 3-D visualization of the T4SS<sub>pKM101</sub> showing architectural features of the OMCC and IMC and its comparison with purified VirB<sub>3-10</sub> complex from R388.

## References

1. **Hu B, Khara P, Christie PJ.** 2019. Structural bases for F plasmid conjugation and F pilus biogenesis in *Escherichia coli*. *Proc Natl Acad Sci U S A* **116**:14222-14227.
2. **Whitaker N, Berry TM, Rosenthal N, Gordon JE, Gonzalez-Rivera C, Sheehan KB, Truchan HK, VieBrock L, Newton IL, Carlyon JA, Christie PJ.** 2016. Chimeric coupling proteins mediate transfer of heterologous type IV effectors through the *Escherichia coli* pKM101-encoded conjugation machine. *J Bacteriol* **198**:2701-2718.
3. **Gordon JE, Costa TRD, Patel RS, Gonzalez-Rivera C, Sarkar MK, Orlova EV, Waksman G, Christie PJ.** 2017. Use of chimeric type IV secretion systems to define contributions of outer membrane subassemblies for contact-dependent translocation. *Mol Microbiol* **105**:273-293.
4. **Christie PJ, Atmakuri K, Krishnamoorthy V, Jakubowski S, Cascales E.** 2005. Biogenesis, architecture, and function of bacterial type IV secretion systems. *Annu Rev Microbiol* **59**:451-485.
5. **Corpet F.** 1988. Multiple sequence alignment with hierarchical clustering. *Nucleic Acids Res* **16**:10881-10890.
6. **Fronzes R, Schafer E, Wang L, Saibil HR, Orlova EV, Waksman G.** 2009. Structure of a type IV secretion system core complex. *Science* **323**:266-8.
7. **Rivera-Calzada A, Fronzes R, Savva CG, Chandran V, Lian PW, Laeremans T, Pardon E, Steyaert J, Remaut H, Waksman G, Orlova EV.** 2013. Structure of a bacterial type IV secretion core complex at subnanometre resolution. *EMBO J* **32**:1195-204.
8. **Chandran V, Fronzes R, Duquerroy S, Cronin N, Navaza J, Waksman G.** 2009. Structure of the outer membrane complex of a type IV secretion system. *Nature* **462**:1011-1015.
9. **Low HH, Gubellini F, Rivera-Calzada A, Braun N, Connery S, Dujancourt A, Lu F, Redzej A, Fronzes R, Orlova EV, Waksman G.** 2014. Structure of a type IV secretion system. *Nature* **508**:550-553.
