# Supplementary material for: In Situ Visualization of the pKM101-Encoded Type IV Secretion System Reveals a Highly Symmetric ATPase Energy Center
Source: PubMed Central journal article supplement (PMC8510550; doi:10.1128/mbio.02465-21), 2021-10-12
Supplement: mbio.02465-21-sf003.pdf [file mbio.02465-21-sf003.pdf]

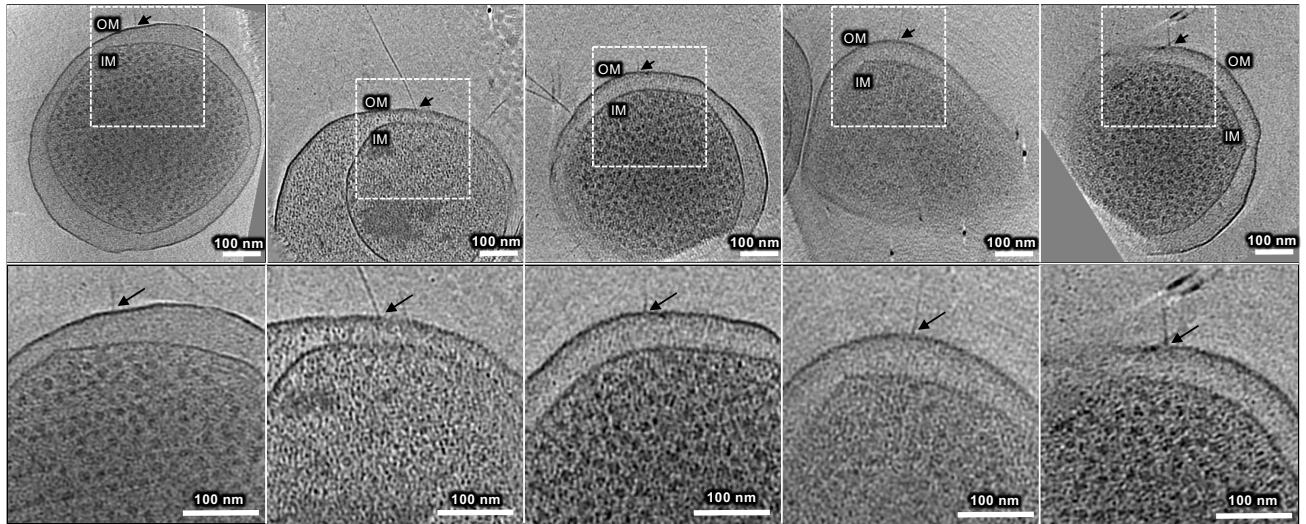

**Fig. S3.** Detection of pKM101 pilus docked on *E. coli* outer membrane. Docked pili (indicated by black arrow) lack detectable associated densities in the OM or periplasm. The boxed regions were magnified and shown in the lower panels.
