# Supplementary material for: In Situ Visualization of the pKM101-Encoded Type IV Secretion System Reveals a Highly Symmetric ATPase Energy Center
Source: PubMed Central journal article supplement (PMC8510550; doi:10.1128/mbio.02465-21), 2021-10-12
Supplement: mbio.02465-21-sf004.pdf [file mbio.02465-21-sf004.pdf]

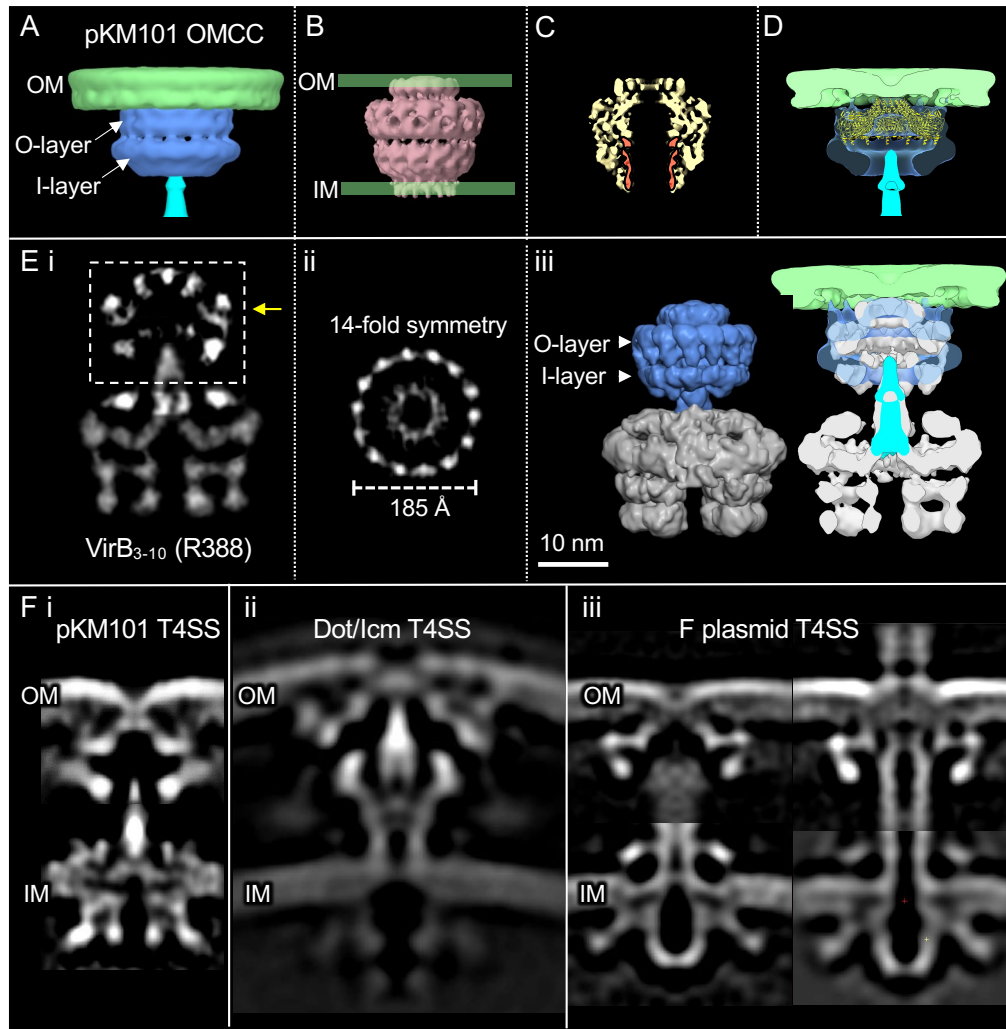

**Fig. S4.** Comparisons of the outer membrane core complexes (OMCCs) and stalks/cylinders of ‘minimized’ and ‘expanded’ T4SSs. **(A)** OMCC of the pKM101 T4SS visualized in this study by *in situ* CryoET. **(B, C)** Structures obtained by overproduction and purification of the pKM101 OMCC followed by characterization with single particle cryoelectron microscopy (CryoEM) (**B**, EMD:5031, **C**, EMD:2232) (6, 7). The red lines in panel **C** image denote the TraF<sub>B10</sub> linker region, which extends from the O-layer of the OMCC through the I-layer to the inner membrane (not shown) **(D)** The *in situ* OMCC<sub>pKM101</sub> with a superimposed atomic structure of the O-layer obtained by X-ray crystallography (PDB:3JQO) (8). **(E i)** A central slice of the averaged structure of the VirB<sub>3-10</sub> complex obtained by overproduction of the R388-encoded VirB3 - VirB10 homologs followed by affinity purification and analysis by negative-stain electron microscopy (EMD:2567) (9). **(Eii)** A cross-section view of the OMCC at the position marked by a yellow arrow in panel **Ei** showing 14-fold symmetry. **(Eiii)** The VirB<sub>3-10</sub> structure with the superimposed OMCC from the T4SS<sub>pKM101</sub> visualized by *in situ* CryoET. **(Fi-iii)** Comparison of the central stalk/cylinder of the ‘minimized’ (pKM101) and ‘expanded’ Dot/Icm and F plasmid-encoded T4SSs visualized by *in situ* CryoET.
