# Supplementary material for: In Situ Visualization of the pKM101-Encoded Type IV Secretion System Reveals a Highly Symmetric ATPase Energy Center
Source: PubMed Central journal article supplement (PMC8510550; doi:10.1128/mbio.02465-21), 2021-10-12
Supplement: mbio.02465-21-st001.pdf [file mbio.02465-21-st001.pdf]

**Supplementary Information for:**

***In Situ* Visualization of the pKM101-Encoded Type IV Secretion System Reveals a Highly Symmetric ATPase Energy Center at the Channel Entrance**

**Pratck Khara, Liqiang Song, Peter J. Christie\*, Bo Hu\***

Department of Microbiology and Molecular Genetics, McGovern Medical School,  
6431 Fannin St, Houston, Texas 77030

\*Correspondence to: Bo Hu or Peter J. Christie

Department of Microbiology and Molecular Genetics, McGovern Medical School, Houston, TX 77030.

Fax: 713-500-5499

Hu:

Phone: 713-500-5891

e-mail: [Bo.Hu@uth.tmc.edu](mailto:Bo.Hu@uth.tmc.edu)

Christie:

Phone: 713-500-5440

e-mail: [Peter.J.Christie@uth.tmc.edu](mailto:Peter.J.Christie@uth.tmc.edu)

**This PDF file includes:**

**Table S1**

**Figures S1-S6**

**References**

**Other supplementary materials for this manuscript include the following:**

**Movies S1, S2**

**Table S1. List of strains, plasmids, and oligonucleotides used in these studies.**

| Strains                           | Genotype                                                                                                                                                                                         | Source                              |
|-----------------------------------|--------------------------------------------------------------------------------------------------------------------------------------------------------------------------------------------------|-------------------------------------|
| UU2834                            | <i>(tsr)5547 (aer)1 yjgG::genR (trg)4543 min::kan (flbBflaH)4 mreB-A125V thr(Am)-1 leuB6 his-4 metF(Am)159 rpsL136 [thi-1 ara-14 lacY1 mtl-1 xyl-5 tonA31 tsx-78]</i>                            | (1)                                 |
| MG1655                            | <i>ilvG rpb-50 rph-1 ΔlacU169</i>                                                                                                                                                                | <i>E. coli</i> Genetic Stock Center |
| MC4100 <sup>rif<sup>R</sup></sup> | F- [ <i>araD139</i> ] <sub>B/r</sub> Δ( <i>argF-lac</i> )169 λ <sup>-</sup> <i>e14<sup>-</sup> flhD5301 Δ(fruK-yeiR)725(fruA25) relA1 rpsL150(strR) rbsR22 Δ(fimB-fimE)632(::IS1) deoC1 rifR</i> | Lab Stock                           |

| Plasmids                               | Characteristics                                                                                  |     |
|----------------------------------------|--------------------------------------------------------------------------------------------------|-----|
| pKM101-Spc <sup>r</sup>                | Spc <sup>r</sup> ; pKM101 derivative                                                             | (2) |
| pJG1004                                | Spc <sup>r</sup> ; pKM101-Spc <sup>r</sup> with a Δ <i>traB</i> mutation                         | (3) |
| pJG1011                                | Spc <sup>r</sup> ; pKM101-Spc <sup>r</sup> with a Δ <i>traG</i> mutation                         | (3) |
| pKM101-Spc <sup>r</sup> -Δ <i>traJ</i> | Spc <sup>r</sup> ; pKM101-Spc <sup>r</sup> with a Δ <i>traJ</i> mutation                         | (2) |
| pMS4                                   | Kan <sup>r</sup> ; pBAD24Kan <sup>r</sup> with P <sub>BAD</sub> :: <i>traB</i> <sub>pKM101</sub> | (3) |
| pMS11                                  | Kan <sup>r</sup> ; pBAD24Kan <sup>r</sup> with P <sub>BAD</sub> :: <i>traG</i> <sub>pKM101</sub> | (3) |
| pTB26                                  | Kan <sup>r</sup> ; pBAD24Kan <sup>r</sup> with P <sub>BAD</sub> :: <i>traJ</i> <sub>pKM101</sub> | (2) |

| Oligonucleotides | Sequences (5' to 3')                | Purpose                                          |
|------------------|-------------------------------------|--------------------------------------------------|
| pKM_up_traB-F    | ATTATGGGCCTGTGGTTGAAAACAAATTC<br>AG | Confirmation of Δ <i>traB</i> mutation in UU2834 |
| pKM_dn_traB-R    | TTCACCCTGTTTAATCAGCTCGGTGGG         | Confirmation of Δ <i>traB</i> mutation in UU2834 |
| pKM_mid_traB-F   | GCCAGGCCAGCTTAACATGCTTAAAGAA<br>G   | Confirmation of Δ <i>traB</i> mutation in UU2834 |
| pKM_mid_traB-R   | CACAAATGCGGAACAGGTTTTTAATGAG<br>GG  | Confirmation of Δ <i>traB</i> mutation in UU2834 |
| pKM_up_traG-F    | CTCTACGATCAGCAGGGTGATGCG            | Confirmation of Δ <i>traG</i> mutation in UU2834 |

|                |                                        |                                                  |
|----------------|----------------------------------------|--------------------------------------------------|
| pKM_dn_traG-R  | CTTCAGGCGAGTAGCCAACCTGAAC              | Confirmation of $\Delta traG$ mutation in UU2834 |
| pKM_mid_traG-F | GCAGATTTTATTAGGAACCTTGCTAAATC<br>GTTGG | Confirmation of $\Delta traG$ mutation in UU2834 |
| pKM_mid_traG-R | ATAATCCCACGCAGCATCATCCCTAAG            | Confirmation of $\Delta traG$ mutation in UU2834 |
| pKM_up_traJ-F  | CCGGCAGGACAGATGATGTTGCATG              | Confirmation of $\Delta traJ$ mutation in UU2834 |
| pKM_dn_traJ-R  | CAAGCAGCTCTTTAAACCGGGCTG               | Confirmation of $\Delta traJ$ mutation in UU2834 |
| pKM_mid_traJ-F | CCATACCTACATACGCTGAGAACTTGC            | Confirmation of $\Delta traJ$ mutation in UU2834 |
| pKM_mid_traJ-R | CATGTTAGCCAGAATGGTCTGAGCC              | Confirmation of $\Delta traJ$ mutation in UU2834 |
